# Supplementary material for: Sorption behaviour in a unique 3,12-connected zinc–organic framework with 2.4 nm cages
Source: Royal Society of Chemistry journal article supplement (doi:10.1039/c3ta12391j), 2013-01-01
Supplement: c3ta12391j.pdf [file c3ta12391j.pdf]

## SUPPORTING INFORMATION

### **Sorption behaviour in a unique 3,12-connected zinc–organic framework with 2.4 nm cages**

*Jinjie Qian<sup>a,b</sup> Feilong Jiang,<sup>a</sup> Kongzhao Su,<sup>a,b</sup> Jie Pan,<sup>a,b</sup> Linjie Zhang,<sup>a,b</sup> Xingjun Li,<sup>a</sup>  
Daqiang Yuan,<sup>a</sup> Maochun Hong<sup>\*a</sup>*

<sup>a</sup>Key Laboratory of Coal to Ethylene Glycol and Its Related Technology, State Key Laboratory of Structure Chemistry, Fujian Institute of Research on the Structure of Matter, Chinese Academy of Sciences, Fuzhou, Fujian, 350002, China

<sup>b</sup>Graduate School of the Chinese Academy of Sciences, Beijing, 100049, China

*\*To whom correspondence should be addressed: E-mail: [hmc@fjirsm.ac.cn](mailto:hmc@fjirsm.ac.cn); Fax: +86-591-83794946; Tel: +86-591-83792460*

# Table of Contents

|                                                                  |         |
|------------------------------------------------------------------|---------|
| <b>Section S1. General Experimental Procedures</b>               | S2-S3   |
| <b>Section S2. Single-Crystal X-ray Crystallography</b>          | S4-S5   |
| <b>Section S3. Additional Structural and Topological Figures</b> | S6-S7   |
| <b>Section S4. Topological Analysis Results</b>                  | S8-S9   |
| <b>Section S5. Powder X-Ray Diffraction</b>                      | S10     |
| <b>Section S6. TGA Plots</b>                                     | S11     |
| <b>Section S7. Elemental Analysis</b>                            | S12     |
| <b>Section S8. Gas Sorption Test</b>                             | S13-S17 |
| <b>Section S9. IAST adsorption selectivity calculation</b>       | S18-S22 |
| <b>Section S10. References</b>                                   | S23     |

## S1. General Experimental Procedures

### 1.1. Materials and Methods.

Reactions were carried out in 23 ml glass vials under autogenous pressure. All the reactants are of reagent-grade quality and used as purchased commercially without further purification. The power X-ray diffraction patterns (PXRD) were collected by a Rigaku D using Cu K $\alpha$  radiation ( $\lambda=0.154$  nm). Single gas adsorption measurements were performed in the Accelerated Surface Area and Porosimetry 2020 (ASAP 2020) System. Elemental analyses for C, H, N were carried out on a German Elementary Vario EL III instrument. Thermogravimetric analyses (TGA) were recorded on a NETZSCH STA 449C unit at a heating rate of 10 °C·min<sup>-1</sup> under flowing nitrogen atmosphere.

### 1.2. Synthesis of [Zn<sub>9</sub>(BTB)<sub>4</sub>(odabco)<sub>3</sub>( $\mu_3$ -O)<sub>3</sub>( $\mu_2$ -H<sub>2</sub>O)<sub>6</sub>]•16DEF (**FJI-2**)

A mixture of Zn(NO<sub>3</sub>)<sub>3</sub>·6H<sub>2</sub>O (0.10 mmol, 30 mg), H<sub>3</sub>BTB (0.05 mmol, 22 mg, H<sub>3</sub>BTB = 1,3,5-Tris(4-carboxyphenyl)benzene) and dabco (0.10 mmol, 11 mg, dabco = 1,4-diazabicyclo[2.2.2]-octane) in N,N'-diethylformamide (DEF) (5 ml) with an additional HBF<sub>4</sub> (0.1 ml, Tetrafluoroboric acid, 40% in water) was sealed in a 23 ml glass vial, which was heated at 85 °C for 4 days, and cooled down to room-temperature. It's worth noting that in the formula of **FJI-2**, the odabco is the product of *in situ* mono-oxidation of the dabco ligand as depicted in the Scheme S1. After washed by fresh acetone, the colorless crystals of **FJI-2** were obtained in *ca.* 66% yield based on the BTB ligand. Elemental analysis was calculated for **FJI-2**: C, 55.26%; H, 6.12%; N, 6.88%. Found: C, 54.66%; H, 5.91%; N, 6.83%. The phase purity of the sample was confirmed by powder X-ray diffraction (PXRD) and more details are shown below in Section S5.

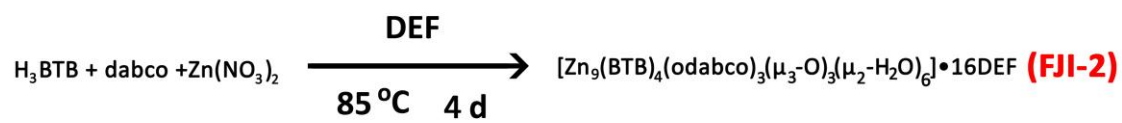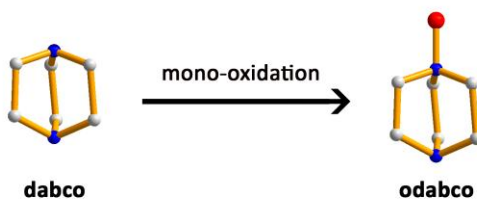

Scheme S1. The synthesis of FJI-2.

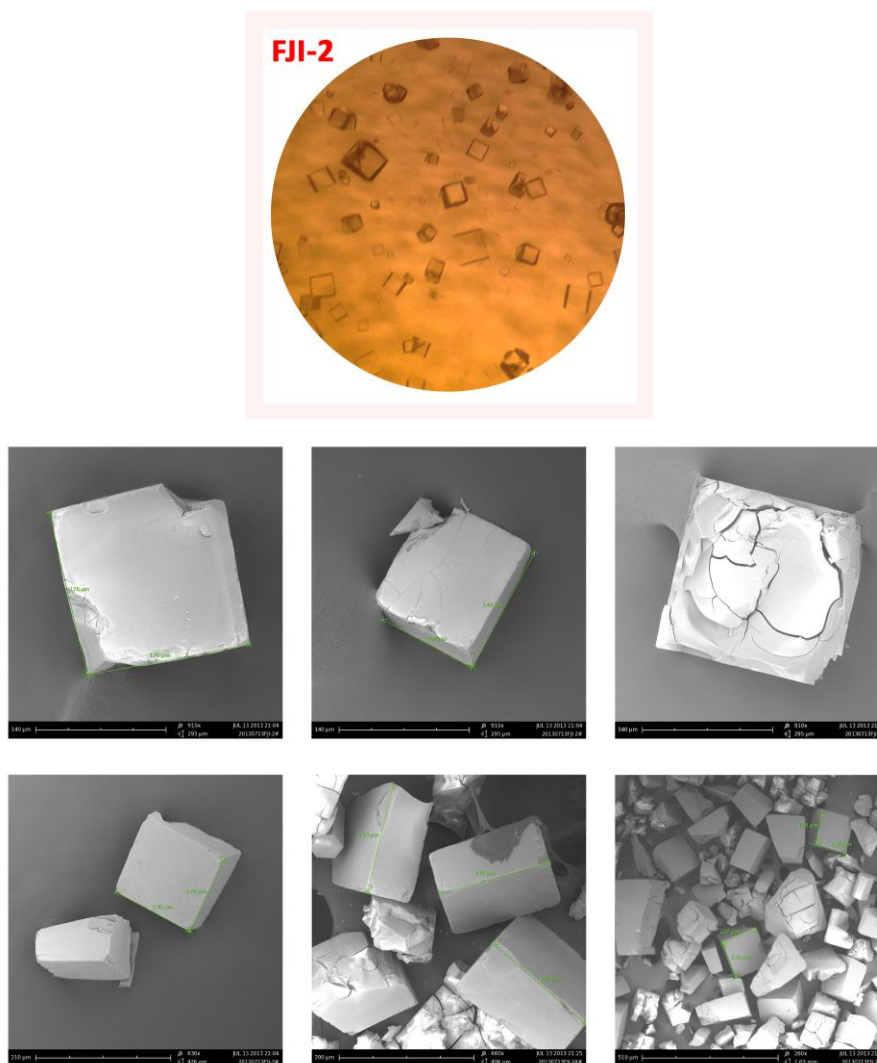

Figure S1. Photographic and SEM images of the acetone-exchanged FJI-2.

## S2. Single-Crystal X-ray Crystallography

The structures data of compound **FJI-2** was collected on a Rigaku Mercury CCD diffractometer equipped with a graphite-monochromated Mo K $\alpha$  radiation ( $\lambda=0.71073\text{\AA}$ ) at room temperature and the structure was resolved by the direct method and refined by full-matrix least-squares fitting on  $F^2$  by SHELX-97.<sup>S1</sup> Crystallographic data and structure refinement parameters at 173 (2) K for **FJI-2** are listed in Table S1. We employed PLATON/SQUEEZE<sup>S2</sup> to calculate the contribution to the diffraction from the solvent region and thereby produced a set of solvent-free diffraction intensities. The final formula of **FJI-2** was calculated from the SQUEEZE<sup>S2</sup> results combined with elemental analysis data and TGA data. More details on the crystallographic studies as well as atomic displacement parameters are given in Supporting Information as CIF files. Crystallographic data for the structures reported in this paper have been deposited. The following crystal structure has been deposited at the Cambridge Crystallographic Data Centre and allocated the deposition number (CCDC No.) 943717 for **FJI-2**.

**Table S1. Crystal Data and Structure Refinement for FJI-2 at 173 (2) K.**

| Items                                                                         | FJI-2-T173K                     |
|-------------------------------------------------------------------------------|---------------------------------|
| chemical formula                                                              | $C_{11}H_5N_{0.50}O_3Zn_{0.75}$ |
| formula mass                                                                  | 241.18                          |
| crystal system                                                                | Cubic                           |
| space group                                                                   | <i>Im</i> -3 (#. 204)           |
| <i>a</i> (Å)                                                                  | 27.3685 (2)                     |
| <i>b</i> (Å)                                                                  | 27.3685 (2)                     |
| <i>c</i> (Å)                                                                  | 27.3685 (2)                     |
| $\alpha$ (°)                                                                  | 90.00                           |
| $\beta$ (°)                                                                   | 90.00                           |
| $\gamma$ (°)                                                                  | 90.00                           |
| unit cell volume (Å <sup>3</sup> )                                            | 20500.0 (3)                     |
| temperature (K)                                                               | 173 (2)                         |
| <i>Z</i>                                                                      | 48                              |
| F(000)                                                                        | 5808                            |
| no. of reflections measured                                                   | 16467                           |
| no. of independent reflections                                                | 3190                            |
| <i>R</i> <sub>int</sub>                                                       | 0.0841                          |
| final <i>R</i> 1 values ( <i>I</i> >2σ( <i>I</i> ))                           | 0.0799                          |
| final w <i>R</i> ( <i>F</i> <sup>2</sup> ) values ( <i>I</i> >2σ( <i>I</i> )) | 0.2527                          |
| goodness of fit on <i>F</i> <sup>2</sup>                                      | 1.092                           |
| flack parameter                                                               | 0.00(2)                         |

### S3. Additional X-ray Crystal Structural and Topological Figures

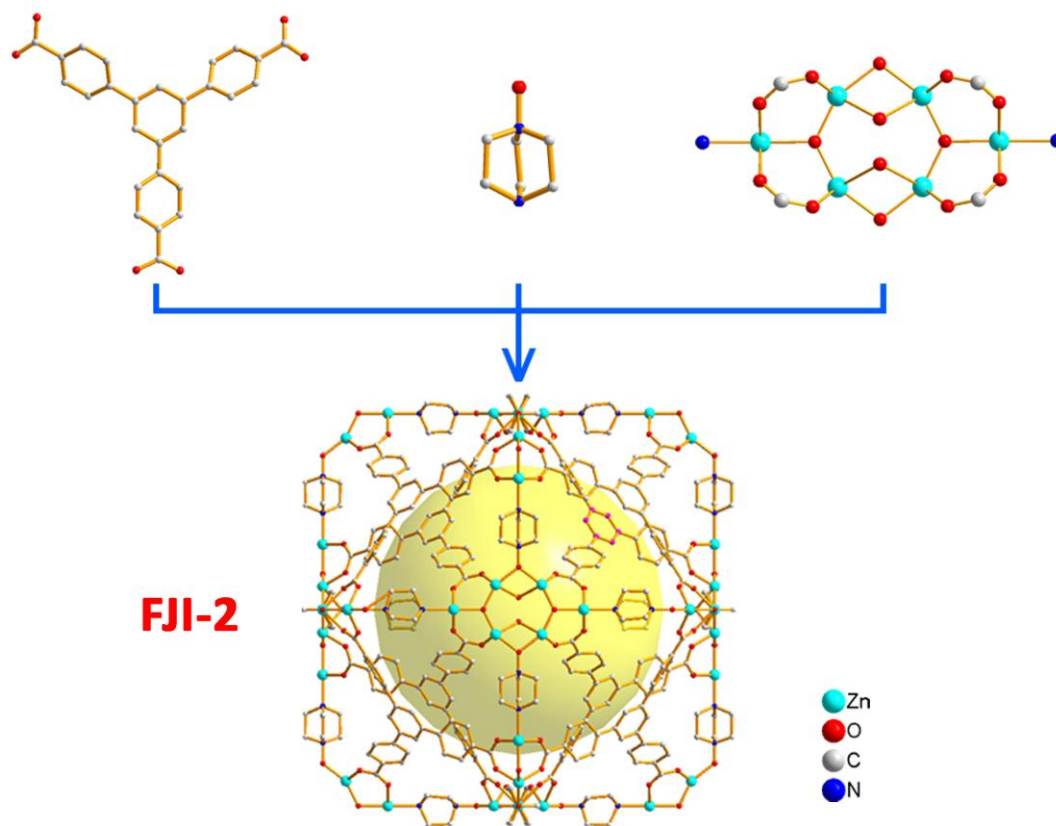

**Figure S2.** The structural components of **FJI-2**.

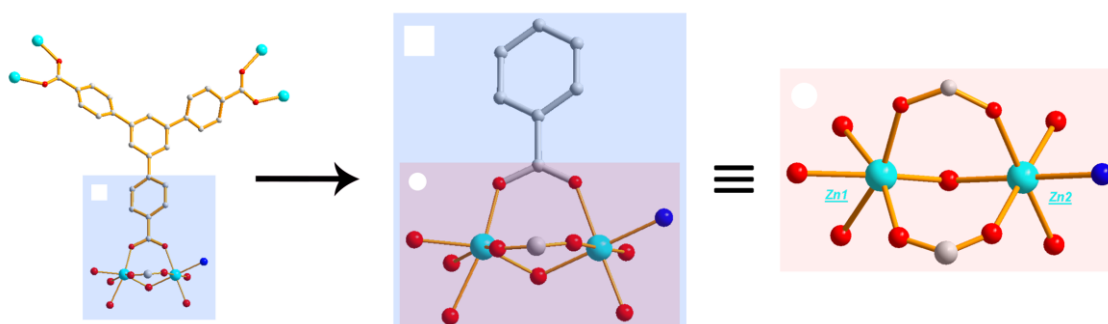

**Figure S3.** The coordination environment of two crystallographically different Zn(II) centers observed in **FJI-2**.

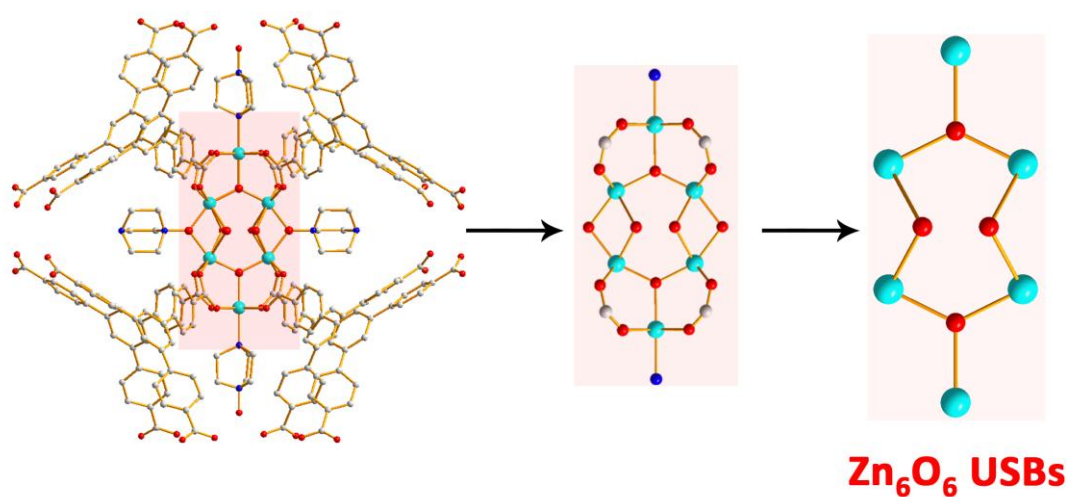

**Figure S4.** Simplified Zn<sub>6</sub>O<sub>6</sub> SBUs in **FJI-2**.

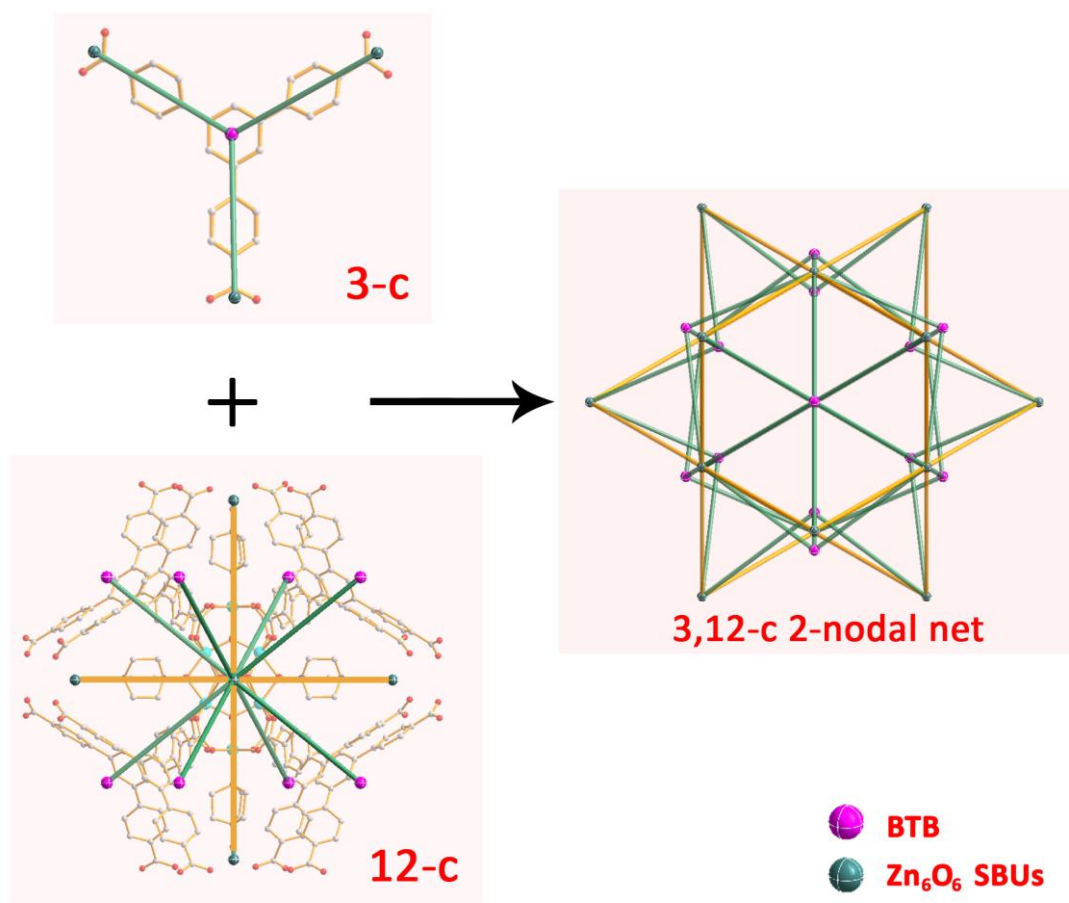

**Figure S5.** Topological analysis of **FJI-2**, BTB ligands as 3-connected nodes and Zn<sub>6</sub>O<sub>6</sub> SBUs as 12-connected nodes.



## S4. Topological Analysis Results by TOPOS 4.0

#####

1:C11 H5 N0.50 O3 Zn0.75

#####

Topology for **BTB 1**

-----

Atom Sc1 links by bridge ligands and has

| Common vertex with | R(A-A) |        |        |          |         |   |
|--------------------|--------|--------|--------|----------|---------|---|
| <b>BTB 1</b>       | 0.0000 | 0.5000 | 0.0000 | ( 0 0 0) | 11.395A | 1 |
| <b>BTB 1</b>       | 0.0000 | 0.0000 | 0.5000 | ( 0 0 0) | 11.395A | 1 |
| <b>BTB 1</b>       | 0.5000 | 0.0000 | 0.0000 | ( 0 0 0) | 11.395A | 1 |

Topology for **BTB 1**

-----

Atom Ti1 links by bridge ligands and has

| Common vertex with                   | R(A-A) |         |         |            |         |   |
|--------------------------------------|--------|---------|---------|------------|---------|---|
| <b>Zn<sub>6</sub>O<sub>6</sub> 1</b> | 0.2139 | 0.2139  | 0.2139  | ( 0 0 0)   | 11.395A | 1 |
| <b>Zn<sub>6</sub>O<sub>6</sub> 1</b> | 0.7861 | -0.2139 | -0.2139 | ( 1 0 0)   | 11.395A | 1 |
| <b>Zn<sub>6</sub>O<sub>6</sub> 1</b> | 0.2139 | -0.2139 | -0.2139 | ( 0 0 0)   | 11.395A | 1 |
| <b>Zn<sub>6</sub>O<sub>6</sub> 1</b> | 0.2139 | -0.2139 | 0.2139  | ( 0 0 0)   | 11.395A | 1 |
| <b>Zn<sub>6</sub>O<sub>6</sub> 1</b> | 0.7861 | -0.2139 | 0.2139  | ( 1 0 0)   | 11.395A | 1 |
| <b>Zn<sub>6</sub>O<sub>6</sub> 1</b> | 0.2139 | 0.2139  | -0.2139 | ( 0 0 0)   | 11.395A | 1 |
| <b>Zn<sub>6</sub>O<sub>6</sub> 1</b> | 0.7861 | 0.2139  | -0.2139 | ( 1 0 0)   | 11.395A | 1 |
| <b>Zn<sub>6</sub>O<sub>6</sub> 1</b> | 0.7861 | 0.2139  | 0.2139  | ( 1 0 0)   | 11.395A | 1 |
| <b>Zn<sub>6</sub>O<sub>6</sub> 1</b> | 0.5000 | 0.0000  | -0.5000 | ( 0 0 -1)  | 13.684A | 1 |
| <b>Zn<sub>6</sub>O<sub>6</sub> 1</b> | 0.5000 | 0.0000  | 0.5000  | ( 0 0 0)   | 13.684A | 1 |
| <b>Zn<sub>6</sub>O<sub>6</sub> 1</b> | 0.5000 | -0.5000 | 0.0000  | ( 0 -1 -1) | 13.684A | 1 |
| <b>Zn<sub>6</sub>O<sub>6</sub> 1</b> | 0.5000 | 0.5000  | 0.0000  | ( 0 0 -1)  | 13.684A | 1 |

-----

Structural group analysis

-----  
Structural group No 1  
-----

Structure consists of 3D framework with **Zn<sub>6</sub>O<sub>63</sub>BTB<sub>8</sub>**

Coordination sequences

-----  
**BTB 1:** 1 2 3 4 5 6 7 8 9 10  
Num 3 27 67 130 227 343 472 632 805 1009  
Cum 4 31 98 228 455 798 1270 1902 2707 3716  
-----

**Zn<sub>6</sub>O<sub>6</sub> 1:** 1 2 3 4 5 6 7 8 9 10  
Num 12 36 84 162 260 374 516 674 860 1062  
Cum 13 49 133 295 555 929 1445 2119 2979 4041  
-----

TD10=3804

Vertex symbols for selected sublattice

-----  
**BTB** Point (Schlafli) symbol: {4<sup>3</sup>}

Extended point symbol: [4(2).4(2).4(2)]

-----  
**Zn<sub>6</sub>O<sub>6</sub>** Point (Schlafli) symbol: {4<sup>28</sup>.6<sup>34</sup>.8<sup>4</sup>}

Extended point symbol:

[4.4.4.4.4.4.4.4.4.4.4.4.4.4.4.4.4.4.4.4.4.4.4(2).4(2).4(2).4(2).6.6.6.6.6.6.6.6.6(2).6(2).6(2).6(6).6(6).6(6).6(6).6(6).6(7).6(7).6(7).6(7).6(7).6(7).6(7).6(7).6(7).6(7).6(7).6(7).6(7).6(7).6(7).6(7).6(7).6(7).6(8).6(8).8(24).8(24).8(24).8(24)]

-----  
Point (Schlafli) symbol for net: {4<sup>28</sup>.6<sup>34</sup>.8<sup>4</sup>}<sub>3</sub>{4<sup>3</sup>}<sub>8</sub>

3,12-c net with stoichiometry (3-c)<sub>8</sub>(12-c)<sub>3</sub>; 2-nodal net

**New topology.**

## S5. Powder X-Ray Diffraction

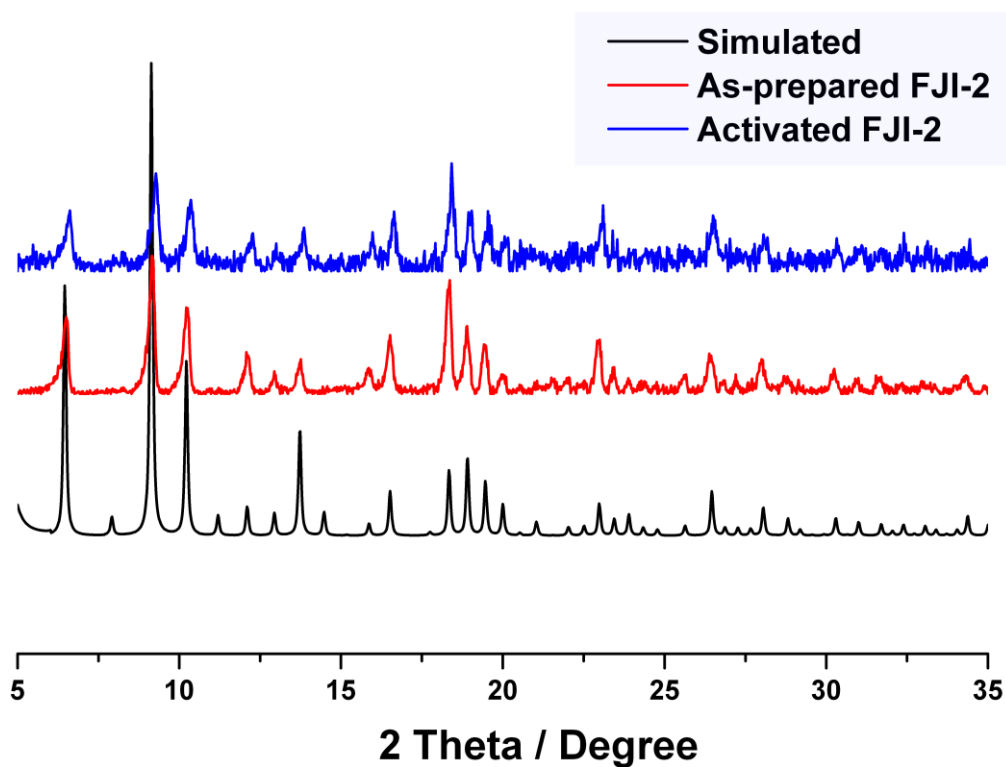

**Figure S6.** PXRD patterns of FJI-2: a) simulated from the crystallographic information file; b) from the as-prepared sample; c) from the desolvated sample activated at 135 oC.

## S6. Thermal Gravimetric Plots

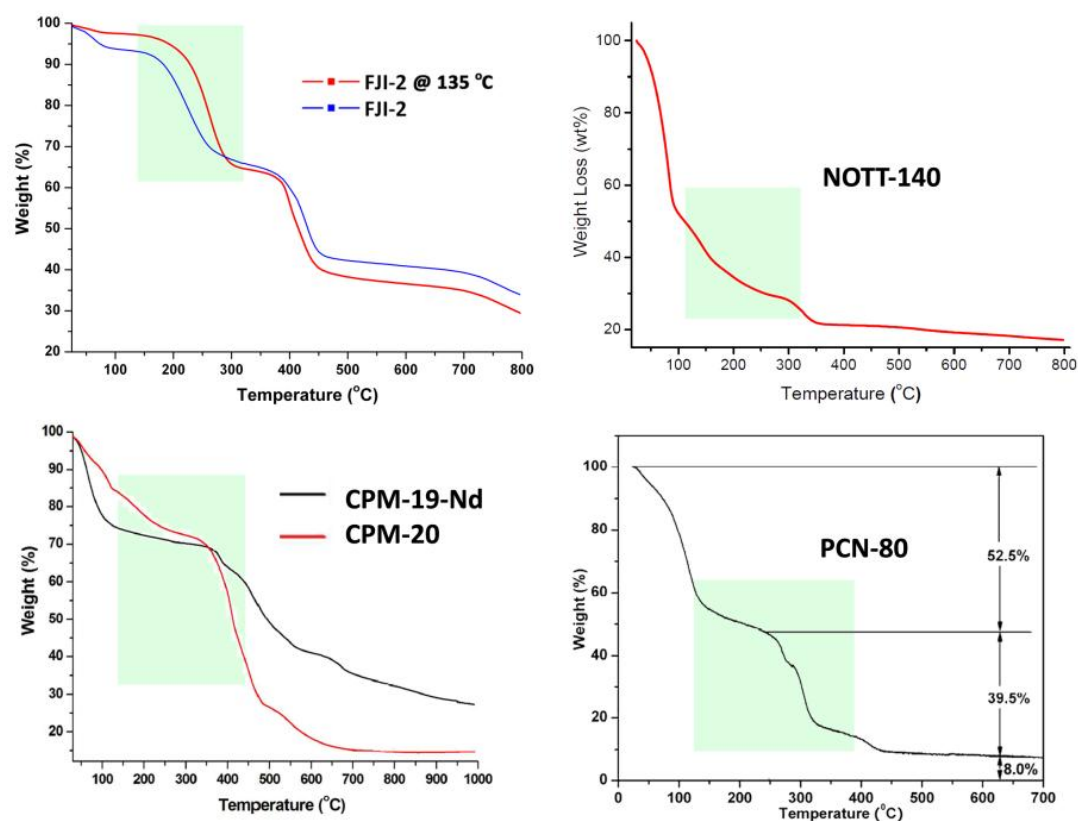

**Figure S7.** TGA curves for **FJI-2** and desolvated **FJI2** activated at 135 °C, and three other famous MOF materials with similar trend in temperature range from 150 to 300 °C.

We notice that the weight loss occurred in the temperature range from 150 degrees to 300 degrees is very common phenomenon in the field of MOF materials,<sup>S3-S5</sup> as depicted in Figure S7. Although we are unable to predict what exactly happen in this temperature region, we boldly assume that it could be caused by the weakened coordination bonds between the metal centers and the organic ligands or even the decomposition of ligands in the framework as the temperature increases.<sup>S6</sup>

## S7. Elemental Analysis

Table S2. Elemental Analysis of FJI-2 with Different Treatment.

|                   | C(%)  | H(%) | N(%) |
|-------------------|-------|------|------|
| Calculated        | 55.26 | 6.12 | 6.88 |
| As-synthesized    | 54.66 | 5.91 | 6.83 |
| Activated @135 °C | 53.78 | 4.47 | 3.15 |

As for the elemental analysis of C, H and N for **FJI-2** and desolvated **FJI-2** materials, this difference in these elements are mainly caused by the removal of guest molecules, including the small H<sub>2</sub>O and *N,N'*-diethylformamide (DEF) molecules.

## S8 Gas Sorption Test

*N<sub>2</sub>, H<sub>2</sub> and CO<sub>2</sub> Isotherms.* N<sub>2</sub>, H<sub>2</sub> and CO<sub>2</sub> isotherms were determined using an IGA gravimetric adsorption apparatus at the Fujian Institute of Research on the Structure of Matter in a clean ultra high vacuum system. Before measurements, about 100 mg acetone-exchanged samples were loaded into the sample basket within the adsorption instrument and then degassed under dynamic vacuum at 135 °C for 10 h to obtain the fully desolvated samples.

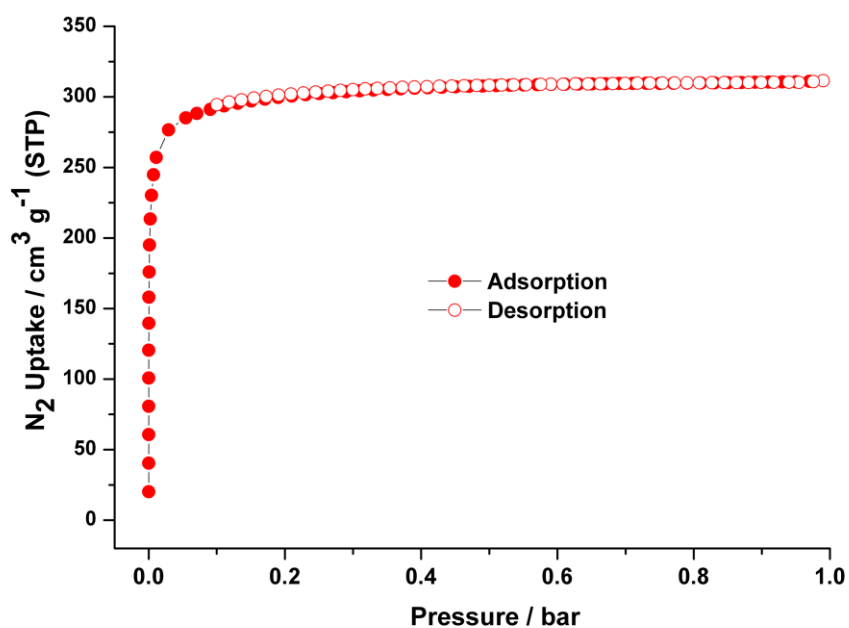

**Figure S8.** N<sub>2</sub> adsorption-desorption isotherms for activated **FJI-2** at 77 K.

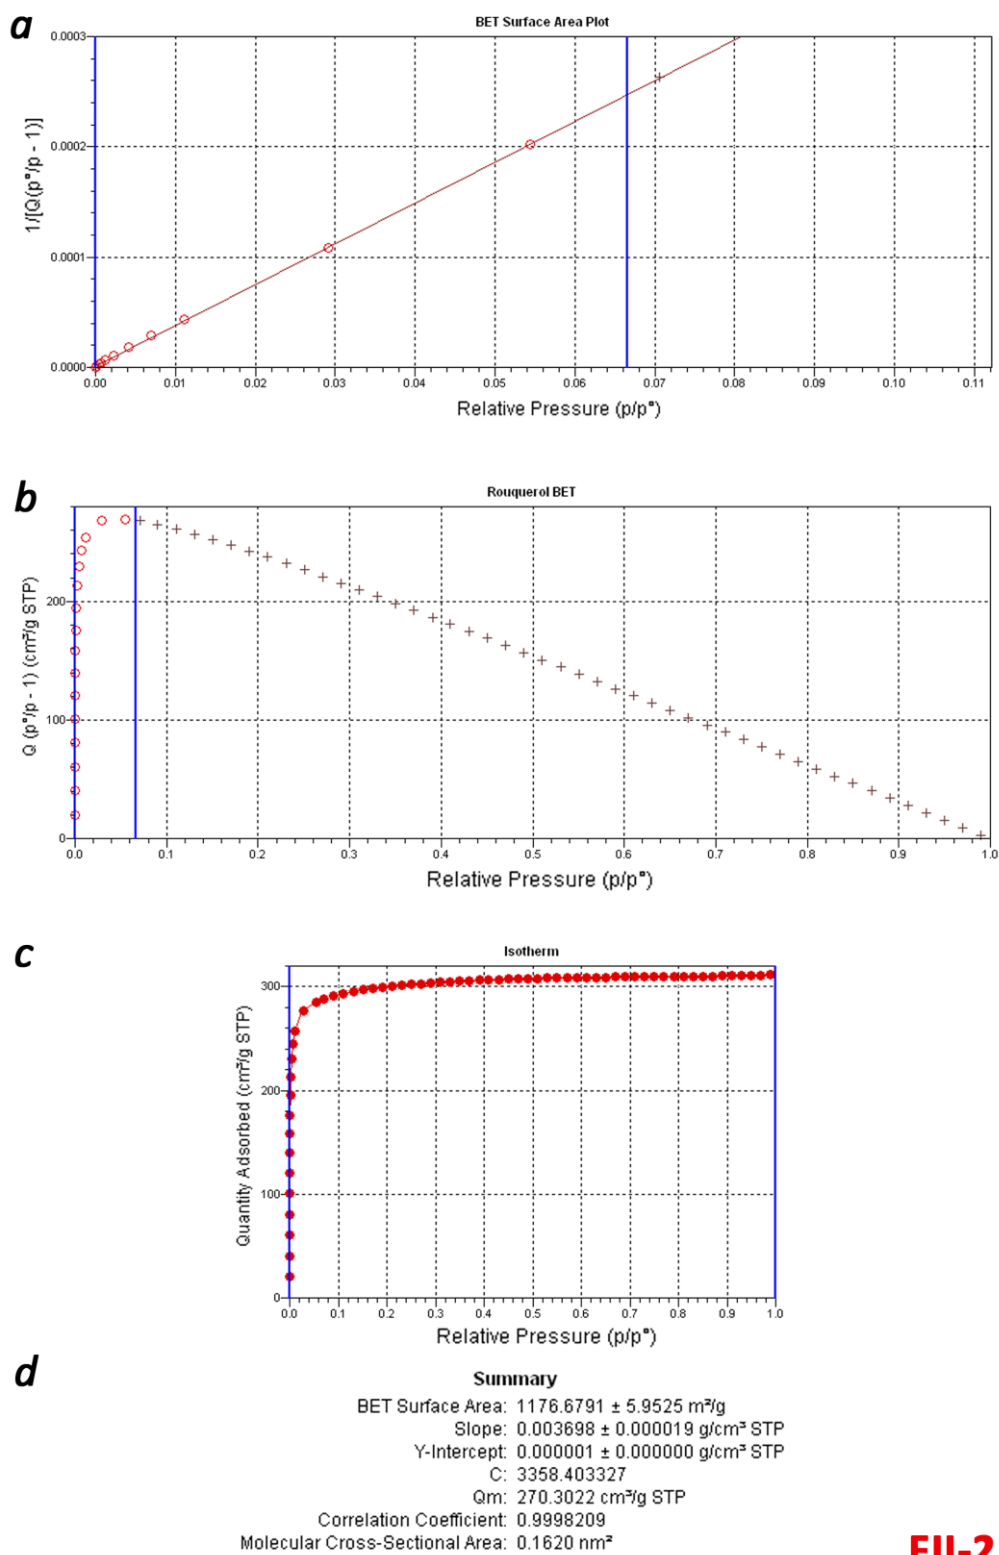

**Figure S9:** The BET surface area report of **FJI-2** sample obtained by  $\text{N}_2$  adsorption data at 77 K on MicroActive Version 1.01.

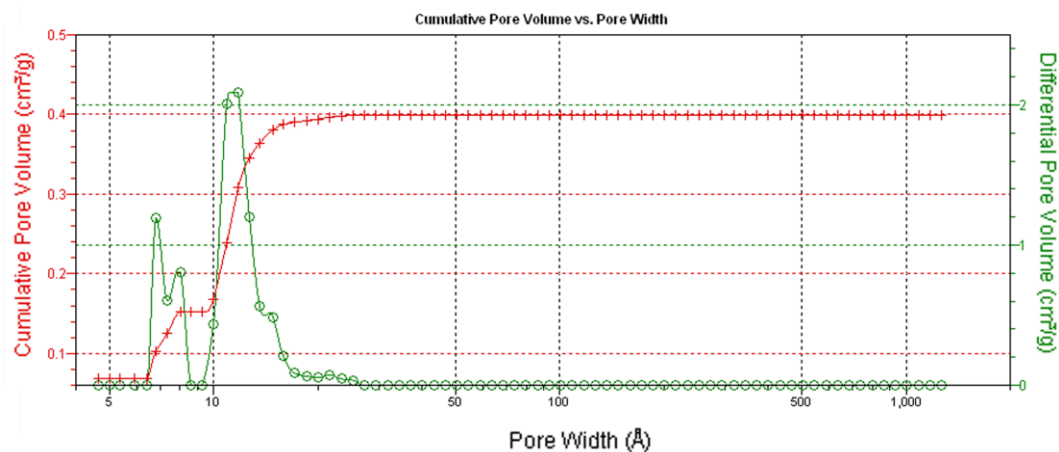

**Figure S10:** Pore size distribution for activated **FJI-2** calculated by NLDFT.

H<sub>2</sub> at 77 K and 87 K, CO<sub>2</sub> and CH<sub>4</sub> isotherms measured at 273 K and 295 K for **IFJI-2** were fit to the following Equation

In Fig. 3b, the adsorption heat ( $Q_{st}$ ) of hydrogen for the desolvated FJI-2 is fitted by Virial method using the data obtained from 77 K and 87 K.

$$\ln(p) = \ln(N) + \frac{1}{T} \sum_{i=0}^m a_i * N_i + \frac{1}{T} \sum_{j=0}^m a_j * N_j$$

N: adsorbed quantity (mg/g);

p: pressure (mmHg);

T: Temperature (K);

a<sub>i</sub>、 b<sub>j</sub>: Constant;

R: 8.314 J·mol<sup>-1</sup>·K<sup>-1</sup>;

The isosteric enthalpy of adsorption ( $Q_{st}$ ):

$$Q_{st} = -R * \ln(p) = -R * \sum_{i=0}^m a_i * N_i$$



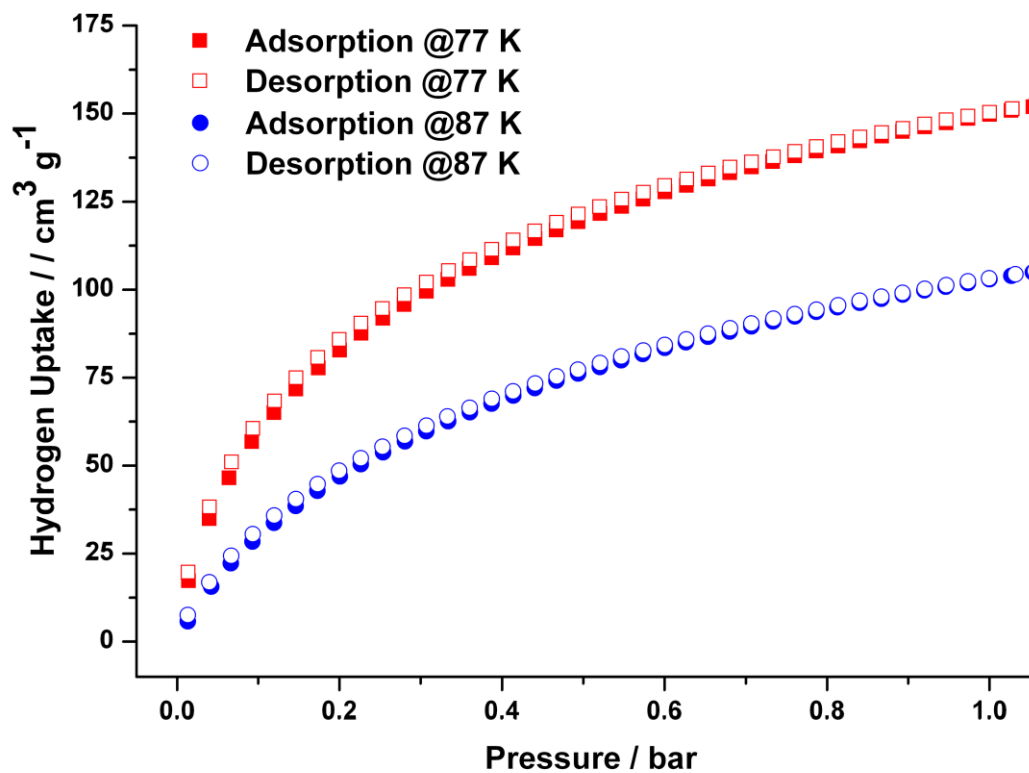

Figure S11: H<sub>2</sub> sorption isotherms for FJI-2 at 77 and 87 K.

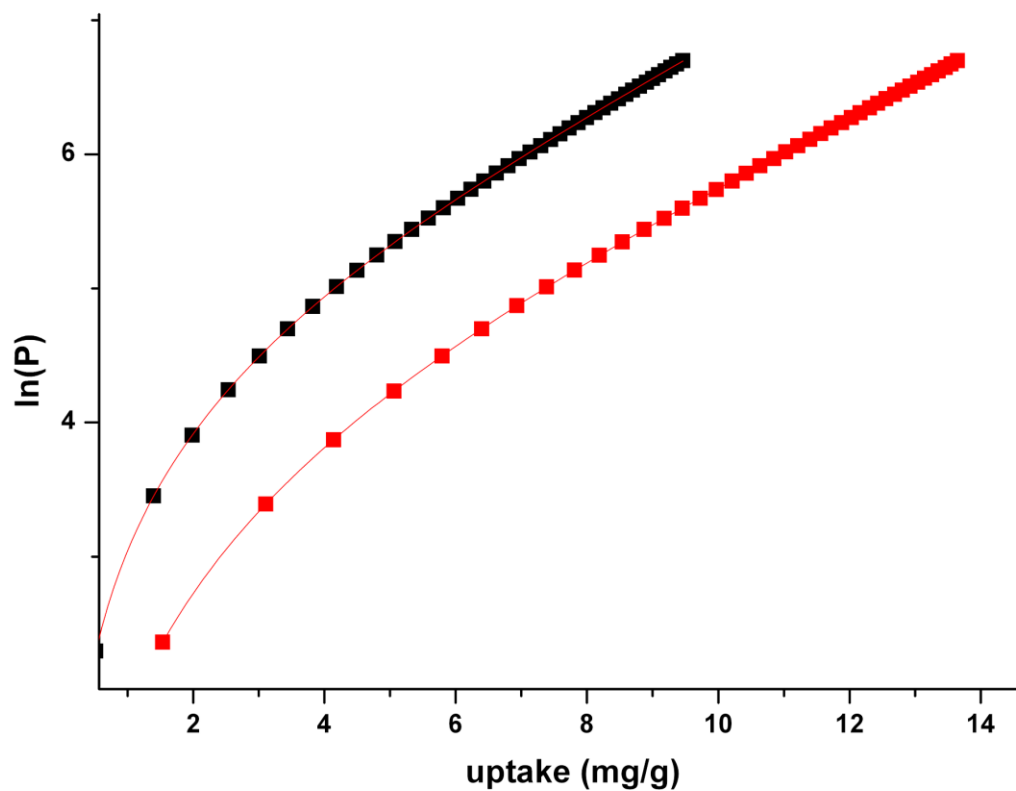

Figure S12: Nonlinear curve fitting of H<sub>2</sub> adsorption isotherms for FJI-2 at 77 K and 87 K.

$$y = \ln(x) + 1/k * (a_0 + a_1*x + a_2*x^2 + a_3*x^3 + a_4*x^4 + a_5*x^5) + (b_0 + b_1*x + b_2*x^2)$$

|       |     | Value      | Standard Error |
|-------|-----|------------|----------------|
| ln(P) | a0* | -863.27827 | 1.90691        |
|       | a1* | 39.34858   | 0.72549        |
|       | a2* | -3.45452   | 0.10874        |
|       | a3* | 0.12442    | 0.01619        |
|       | a4* | -0.00632   | 0.00121        |
|       | a5* | 1.50277E-4 | 3.33409E-5     |
|       | b0* | 12.77152   | 0.022          |
|       | b1* | -0.2453    | 0.00786        |
|       | b2* | 0.02721    | 6.4853E-4      |
|       | k   | 77         | 0              |
|       | k   | 87         | 0              |

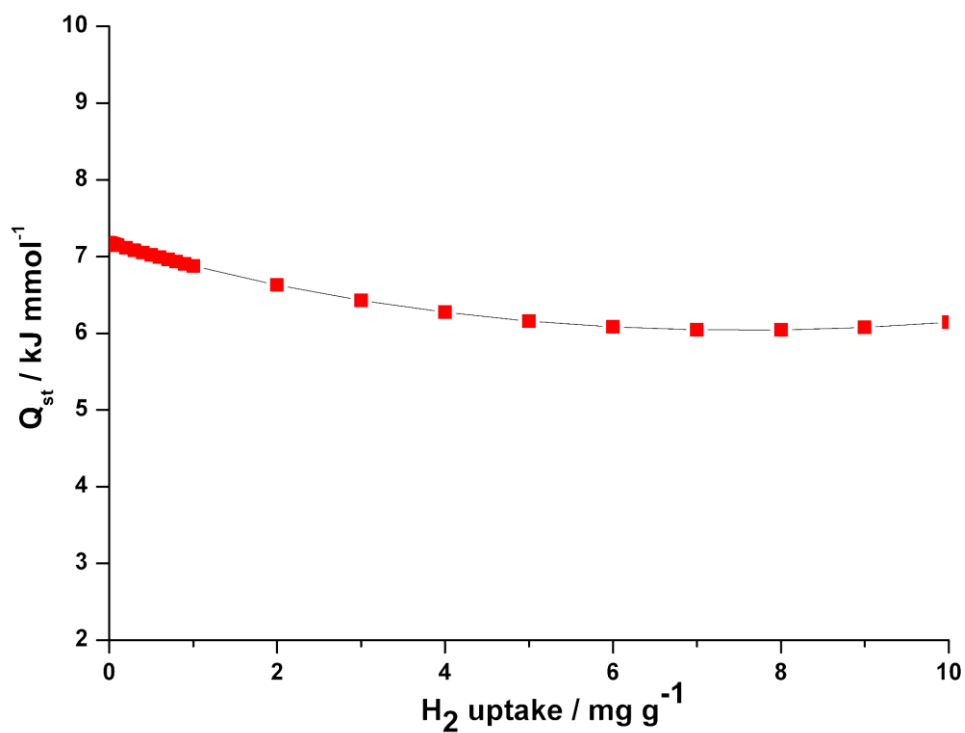

Figure S13: Heats of adsorption for H<sub>2</sub> in FJI-2.

## S9 IAST adsorption selectivity calculation

We adopt the ideal adsorbed solution theory (IAST)<sup>S7</sup> based upon the experimental single gas adsorption measurements as listed in the following pages, including carbon dioxide, methane and nitrogen at 273 K and 295 K, which is commonly used to predict binary mixture adsorption selectivity. Using the pure component isotherm fits, the adsorption selectivity is defined by

$$S_{ads} = (q_1/q_2)/(p_1/p_2),$$

where  $q_i$  is the amount of  $i$  adsorbed and  $p_i$  is the partial pressure of  $i$  in the mixture.

We use the following written codes to simulate the adsorption selectivity of CO<sub>2</sub> over CH<sub>4</sub> or N<sub>2</sub> in Fig. 3d,

```
28          # No. of Pressure Point
y1, y2      # Molar fraction of binary mixture (y1 and y2, y1 + y2 = 1)
1, 2, 3, 4, 5, 6, 7, 8, 9, 10, 20, 30, 40, 50, 60, 70, 80, 90, 100, 101, 102, 103,
104, 105, 106, 107, 108, 109    #The unit is same parameter b, kPa
a1, a1      # fitting parameter Nsat1(A1) for both component (Unit: mmol/g)
b1, b1      # fitting parameter b1 for both component (Unit: kPa-1)
c1, c1      # fitting parameter c1 for both component
0, 0        # fitting parameter Nsat2(A2) for both component (Unit: mmol/g)
0, 0        # fitting parameter b2 for both component (Unit: kPa-1)
1, 1        # fitting parameter c2 for both component
```

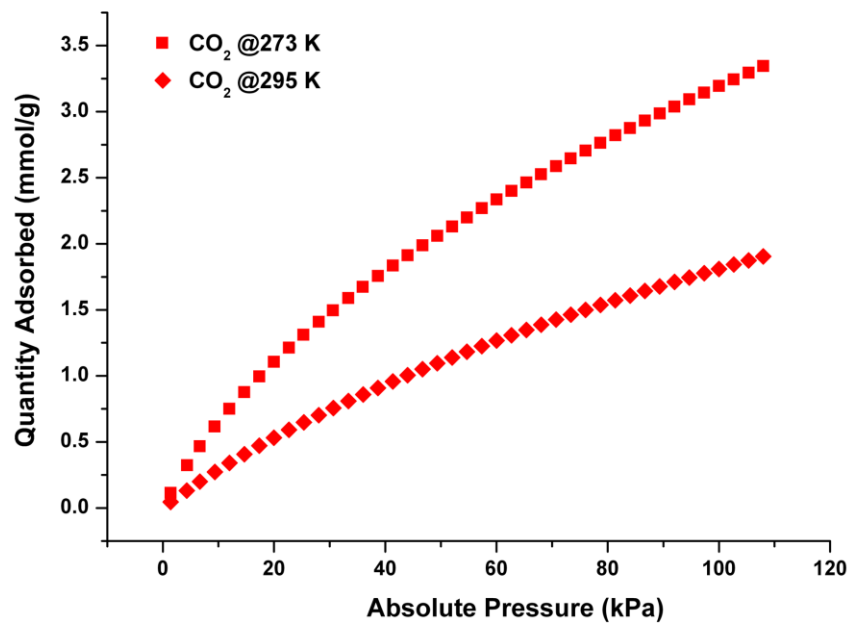

Figure S14: CO<sub>2</sub> adsorption isotherms for FJI-2 at 273 K and 295 K.

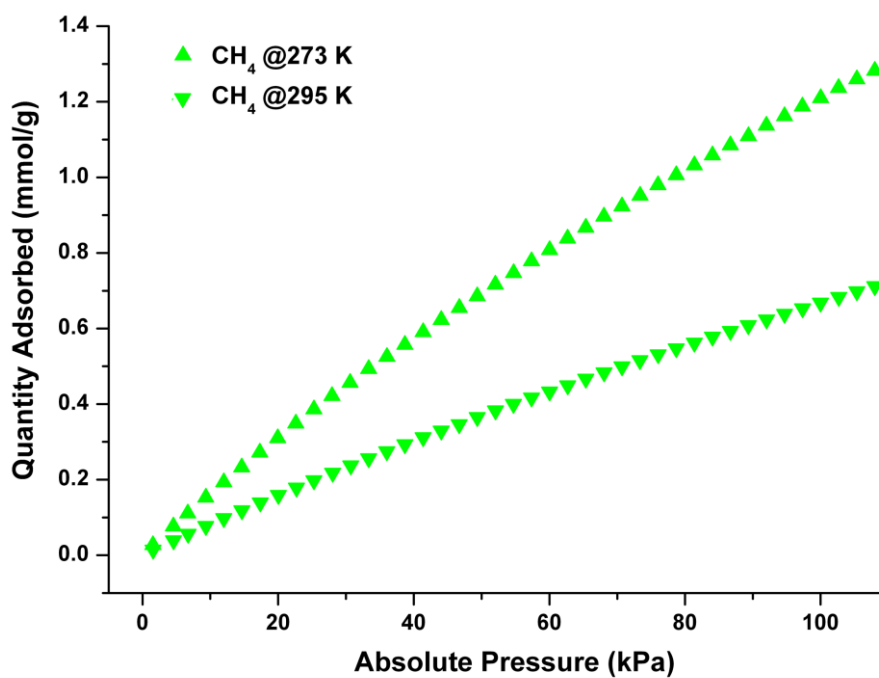

Figure S15: CH<sub>4</sub> adsorption isotherms for FJI-2 at 273 K and 295 K.

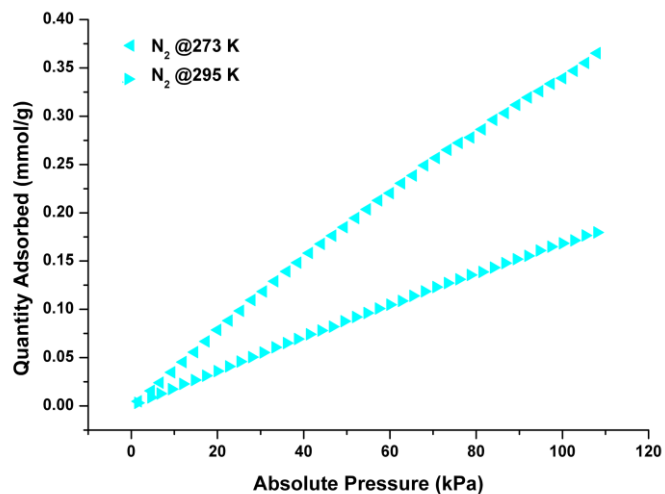

Figure S16: N<sub>2</sub> adsorption isotherms for FJI-2 at 273 K and 295 K.

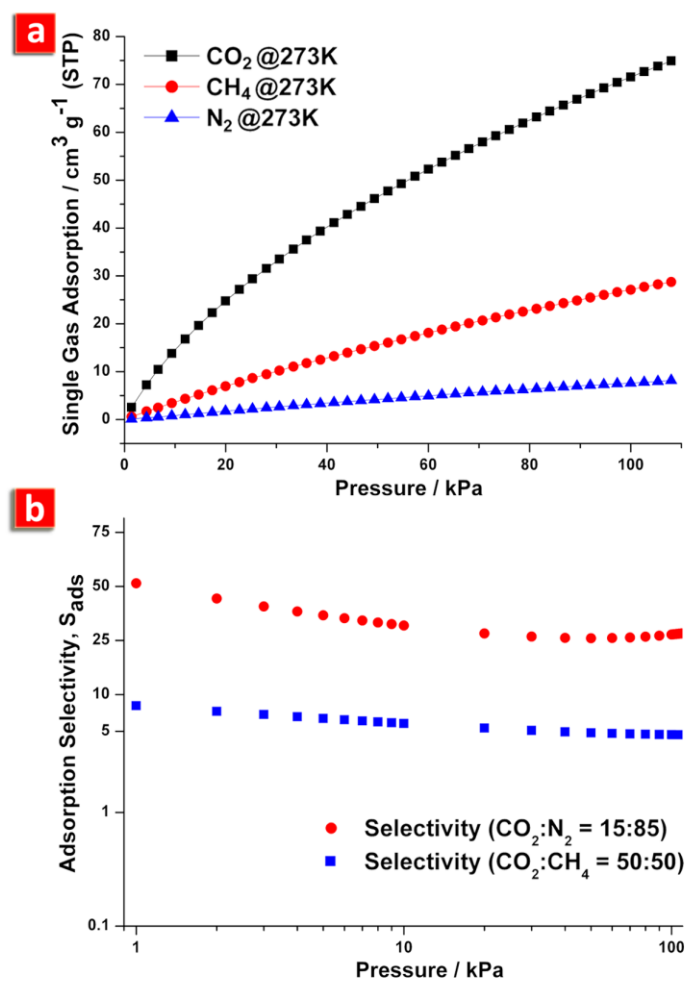

Figure S17: (a) CO<sub>2</sub>, CH<sub>4</sub> and N<sub>2</sub> adsorption isotherm curves in the range of 0 ~ 110 kPa at 273 K. (b) Adsorption selectivity of CO<sub>2</sub> over CH<sub>4</sub> or N<sub>2</sub>.

## Selectivity Data of CO<sub>2</sub>:N<sub>2</sub> (15:85) at 273 K

|            | A(X)     | B(Y)    | C(Y)    | D(Y)    | E(Y)    | F(Y)        |
|------------|----------|---------|---------|---------|---------|-------------|
| Long Name  | Pressure | N1      | N2      | x1      | x2      | Selectivity |
| Units      | kPa      | mmol/g  | mmol/g  |         |         |             |
| Comments   |          |         |         |         |         |             |
| Sparklines |          |         |         |         |         |             |
| 1          | 1        | 0.02305 | 0.00253 | 0.90105 | 0.09895 | 51.60106    |
| 2          | 2        | 0.04037 | 0.00522 | 0.88558 | 0.11442 | 43.8577     |
| 3          | 3        | 0.05597 | 0.00793 | 0.87586 | 0.12414 | 39.98196    |
| 4          | 4        | 0.07053 | 0.01066 | 0.86875 | 0.13125 | 37.5074     |
| 5          | 5        | 0.08434 | 0.01337 | 0.86315 | 0.13685 | 35.74118    |
| 6          | 6        | 0.09756 | 0.01607 | 0.85856 | 0.14144 | 34.39619    |
| 7          | 7        | 0.11032 | 0.01876 | 0.85468 | 0.14532 | 33.32764    |
| 8          | 8        | 0.12267 | 0.02142 | 0.85135 | 0.14866 | 32.45298    |
| 9          | 9        | 0.13468 | 0.02406 | 0.84844 | 0.15157 | 31.721      |
| 10         | 10       | 0.14638 | 0.02667 | 0.84587 | 0.15413 | 31.09786    |
| 11         | 20       | 0.25158 | 0.05132 | 0.83057 | 0.16944 | 27.77787    |
| 12         | 30       | 0.34291 | 0.07324 | 0.824   | 0.176   | 26.53007    |
| 13         | 40       | 0.42534 | 0.09265 | 0.82114 | 0.17886 | 26.01583    |
| 14         | 50       | 0.50127 | 0.10981 | 0.8203  | 0.1797  | 25.86784    |
| 15         | 60       | 0.57209 | 0.12499 | 0.8207  | 0.1793  | 25.93724    |
| 16         | 70       | 0.63876 | 0.13842 | 0.8219  | 0.1781  | 26.15042    |
| 17         | 80       | 0.70197 | 0.1503  | 0.82365 | 0.17635 | 26.4663     |
| 18         | 90       | 0.76222 | 0.16081 | 0.82578 | 0.17422 | 26.85994    |
| 19         | 100      | 0.81993 | 0.1701  | 0.82819 | 0.17181 | 27.3153     |
| 20         | 101      | 0.82557 | 0.17097 | 0.82844 | 0.17156 | 27.36377    |
| 21         | 102      | 0.83119 | 0.17182 | 0.82869 | 0.17131 | 27.41276    |
| 22         | 103      | 0.83679 | 0.17267 | 0.82895 | 0.17105 | 27.46221    |
| 23         | 104      | 0.84237 | 0.1735  | 0.82921 | 0.17079 | 27.51215    |
| 24         | 105      | 0.84793 | 0.17433 | 0.82947 | 0.17053 | 27.56258    |
| 25         | 106      | 0.85347 | 0.17514 | 0.82973 | 0.17027 | 27.61345    |
| 26         | 107      | 0.85898 | 0.17595 | 0.82999 | 0.17001 | 27.66479    |
| 27         | 108      | 0.86448 | 0.17674 | 0.83025 | 0.16975 | 27.7166     |
| 28         | 109      | 0.86996 | 0.17753 | 0.83052 | 0.16948 | 27.76882    |

## Selectivity Data of CO<sub>2</sub>:CH<sub>4</sub> (50:50) at 273 K

|            | A(X)     | B(Y)    | C(Y)    | D(Y)    | E(Y)    | F(Y)        |
|------------|----------|---------|---------|---------|---------|-------------|
| Long Name  | Pressure | N1      | N2      | x1      | x2      | Selectivity |
| Units      | kPa      | mmol/g  | mmol/g  |         |         |             |
| Comments   |          |         |         |         |         |             |
| Sparklines |          |         |         |         |         |             |
| 1          | 1        | 0.06046 | 0.00744 | 0.89046 | 0.10954 | 8.12907     |
| 2          | 2        | 0.10552 | 0.01442 | 0.87981 | 0.12019 | 7.32022     |
| 3          | 3        | 0.1459  | 0.02117 | 0.87328 | 0.12672 | 6.8914      |
| 4          | 4        | 0.18342 | 0.02776 | 0.86853 | 0.13147 | 6.6066      |
| 5          | 5        | 0.21887 | 0.03422 | 0.86481 | 0.13519 | 6.39679     |
| 6          | 6        | 0.25271 | 0.04055 | 0.86174 | 0.13826 | 6.2326      |
| 7          | 7        | 0.28523 | 0.04677 | 0.85913 | 0.14087 | 6.0989      |
| 8          | 8        | 0.31663 | 0.05289 | 0.85688 | 0.14313 | 5.98692     |
| 9          | 9        | 0.34707 | 0.05891 | 0.85489 | 0.14511 | 5.89114     |
| 10         | 10       | 0.37664 | 0.06485 | 0.85311 | 0.14689 | 5.80787     |
| 11         | 20       | 0.63905 | 0.12013 | 0.84176 | 0.15824 | 5.31944     |
| 12         | 30       | 0.86195 | 0.16949 | 0.83568 | 0.16432 | 5.08572     |
| 13         | 40       | 1.05933 | 0.21417 | 0.83183 | 0.16817 | 4.94627     |
| 14         | 50       | 1.23782 | 0.25497 | 0.8292  | 0.1708  | 4.85482     |
| 15         | 60       | 1.40137 | 0.29244 | 0.82735 | 0.17265 | 4.79194     |
| 16         | 70       | 1.55264 | 0.32703 | 0.82602 | 0.17398 | 4.74775     |
| 17         | 80       | 1.69354 | 0.35906 | 0.82507 | 0.17493 | 4.71661     |
| 18         | 90       | 1.82549 | 0.38882 | 0.82441 | 0.17559 | 4.69499     |
| 19         | 100      | 1.94965 | 0.41654 | 0.82396 | 0.17604 | 4.68057     |
| 20         | 101      | 1.96167 | 0.41921 | 0.82393 | 0.17607 | 4.67945     |
| 21         | 102      | 1.97362 | 0.42186 | 0.82389 | 0.17611 | 4.67839     |
| 22         | 103      | 1.98551 | 0.42449 | 0.82386 | 0.17614 | 4.67739     |
| 23         | 104      | 1.99733 | 0.42711 | 0.82383 | 0.17617 | 4.67643     |
| 24         | 105      | 2.00908 | 0.4297  | 0.82381 | 0.17619 | 4.67553     |
| 25         | 106      | 2.02077 | 0.43228 | 0.82378 | 0.17622 | 4.67467     |
| 26         | 107      | 2.0324  | 0.43484 | 0.82375 | 0.17625 | 4.67387     |
| 27         | 108      | 2.04396 | 0.43739 | 0.82373 | 0.17627 | 4.67311     |
| 28         | 109      | 2.05546 | 0.43992 | 0.82371 | 0.17629 | 4.6724      |

## S10. References.

- [S1] Sheldrick, G. M. SHELXS-97, Programs for X-ray Crystal Structure Solution; University of Göttingen: Germany, **1997**.
- [S2] (a) A. L. Spek, *J. Appl. Crystallogr.* **2003**, *36*, 7; (b) P. v.d. Sluis and A. L. Spek, *Acta Crystallogr., Sect. A*, **1990**, *46*, 194.
- [S3] Zheng, S. T.; Wu, T.; Chou, C. T.; Fuhr, A.; Feng, P. Y.; Bu, X. H. *J. Am. Chem. Soc.* **2012**, *134*, 4517.
- [S4] Tan, C. R.; Yang, S. H.; Champness, N. R.; Lin, X. A.; Blake, A. J.; Lewis, W.; Schroder, M. *Chem. Commun.* **2011**, *47*, 4487.
- [S5] Lu, W. G.; Yuan, D. Q.; Makal, T. A.; Li, J. R.; Zhou, H. C. *Angew. Chem. Int. Ed.* **2012**, *51*, 1580.
- [S6] Yuan, D. Q.; Zhao, D.; Timmons, D. J.; Zhou, H. C. *Chem. Sci.* **2011**, *2*, 103.
- [S7] A. L. Myers and J. M. Prausnitz, *AIChE J.* *11*, 121–130 (**1965**).
